# Supplementary material for: MeOx/Al2O3 and MeOx/CeO2 (Me = Fe, Co, Ni) catalysts for high temperature N2O decomposition and NH3 oxidation
Source: Royal Society of Chemistry journal article supplement (doi:10.1039/c5cy01381j), 2015-10-30
Supplement: c5cy01381j1.pdf [file c5cy01381j1.pdf]

## Supporting Information

$\text{MeO}_x/\text{Al}_2\text{O}_3$  and  $\text{MeO}_x/\text{CeO}_2$  (Me = Fe, Co, Ni) catalysts for high temperature  $\text{N}_2\text{O}$  decomposition and  $\text{NH}_3$  oxidation

L.G. Pinaeva<sup>a,\*</sup>, I.P. Prosvirin<sup>a,b</sup>, L.S. Dovlitova<sup>a</sup>, I.G. Danilova<sup>a</sup>, E.M. Sadovskaya<sup>a,b</sup>, L.A.

Isupova<sup>a</sup>

<sup>a</sup> Borekov Institute of Catalysis, 5, Pr. Lavrentieva, Novosibirsk 630090, Russia

<sup>b</sup> Novosibirsk State University, 2, Pirogova street, Novosibirsk 630090, Russia

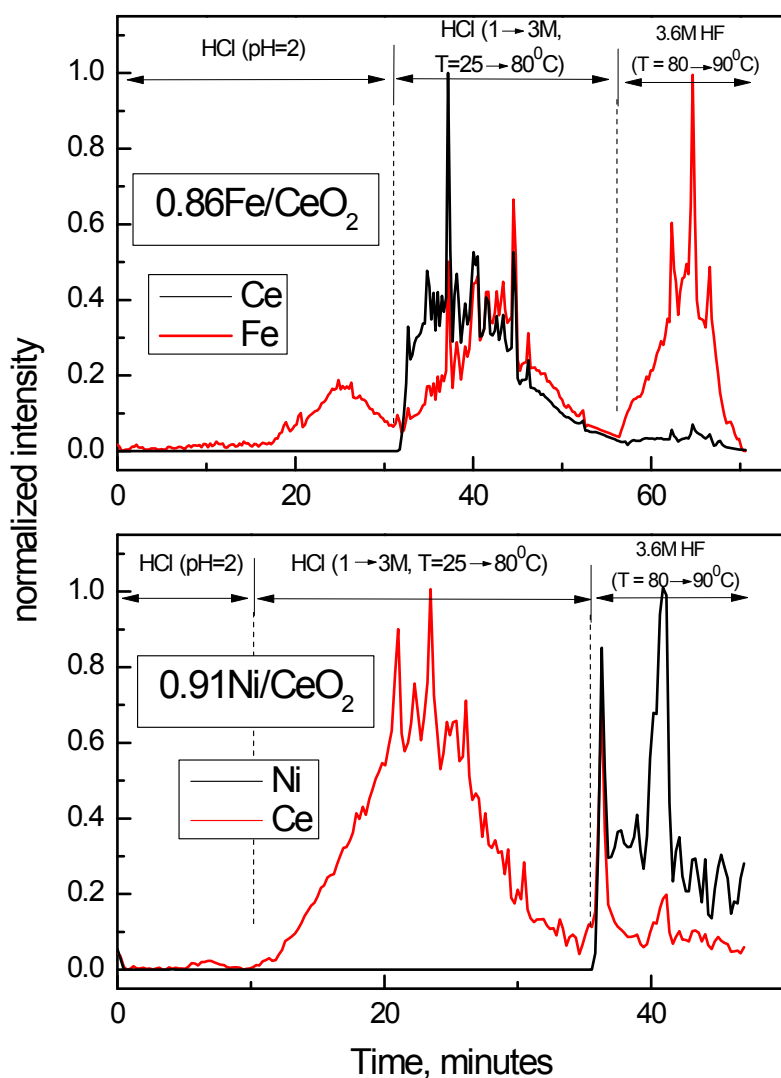

Fig.S1. Differential dissolution phase analysis spectra of 0.86Fe/CeO<sub>2</sub> and 0.91Ni/CeO<sub>2</sub> samples.

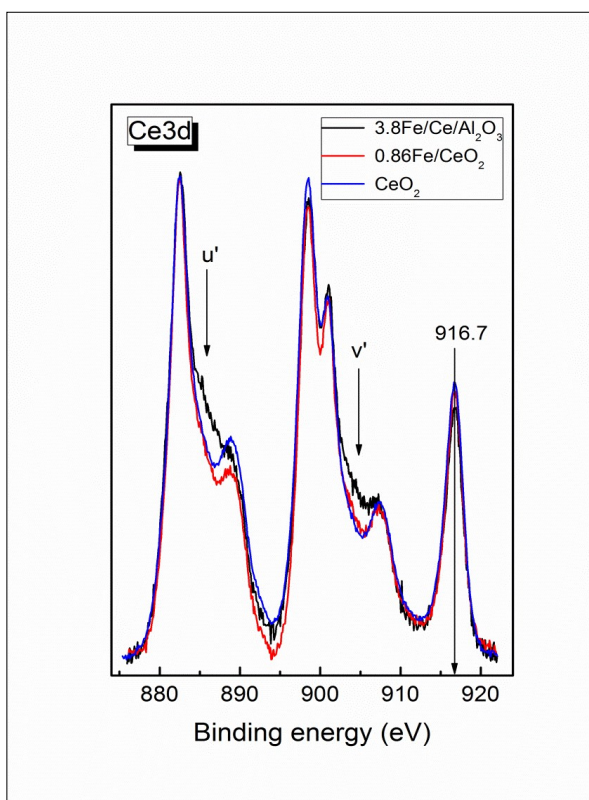

Fig. S2. Ce3d spectra of CeO<sub>2</sub>, 0.86Fe/CeO<sub>2</sub> and 3.8Fe/Ce/Al<sub>2</sub>O<sub>3</sub> samples.

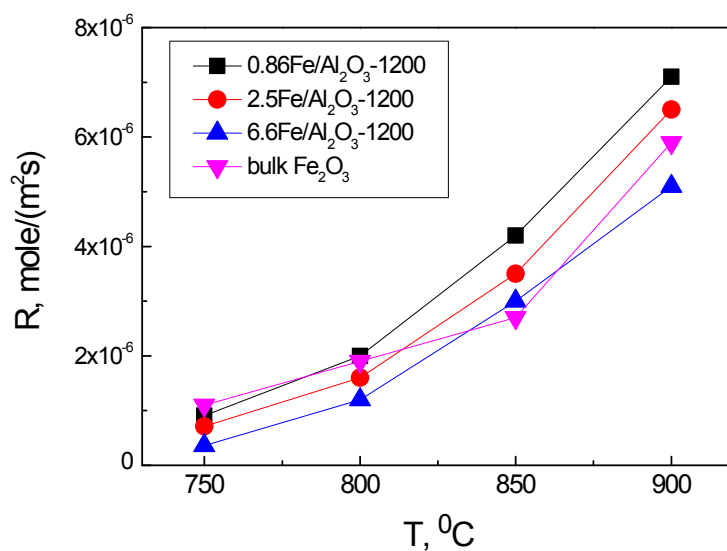

Fig.S3. Activity of different Fe/Al<sub>2</sub>O<sub>3</sub>-1200 and bulk Fe<sub>2</sub>O<sub>3</sub> samples in the reaction of N<sub>2</sub>O decomposition.

### **Temperature-programmed isotopic exchange (TPIE) O<sub>2</sub>.**

Oxygen isotopic exchange in a temperature-programmed mode (TPIE) was used to characterize oxygen mobility in the samples. Before every experiment, sample loaded

into a reactor (quartz tube, i.d. = 3 mm) was kept in 0.5% vol.<sup>16</sup>O<sub>2</sub>+He flow at 900°C for 30 minutes, then the reactor was cooled down to room temperature in the same flow. At T≤100°C this mixture was replaced stepwise by the same one but containing <sup>18</sup>O<sub>2</sub> and Ar (1 vol.%) as an inert tracer, and the reactor was heated up to 900°C (rate of heating 14.7<sup>o</sup>/min). Gas flow rate and catalyst loading were the same in all experiments and amounted to 5.0 l/h and 0.025 g, respectively. Transient changes in the gas isotopic composition (<sup>16</sup>O<sub>2</sub>, <sup>16</sup>O<sup>18</sup>O and <sup>18</sup>O<sub>2</sub> concentrations) were continuously monitored by mass spectrometry. <sup>18</sup>O atomic fraction in the gas phase  $\alpha_g(t)$  calculated as  $\alpha_g(t) = ({}^{16}\text{O}^{18}\text{O} + 2{}^{18}\text{O}_2) / 2 \sum O^i O^j$ , where  $\sum O^i O^j = {}^{16}\text{O}_2 + {}^{16}\text{O}^{18}\text{O} + {}^{18}\text{O}_2$  was a characteristic of the rate of oxygen exchange.

Change of  $\alpha_g(t)$  during the TPIE on 0.86Fe/CeO<sub>2</sub> and 2.5Fe/CeO<sub>2</sub> samples have been shown in the Fig.S4. One can see that  $\alpha_g(t)$  curve for 2.5Fe/CeO<sub>2</sub> sample is shifted towards higher temperatures thus meaning lower rate of exchange compared with that in 0.86Fe/CeO<sub>2</sub>.

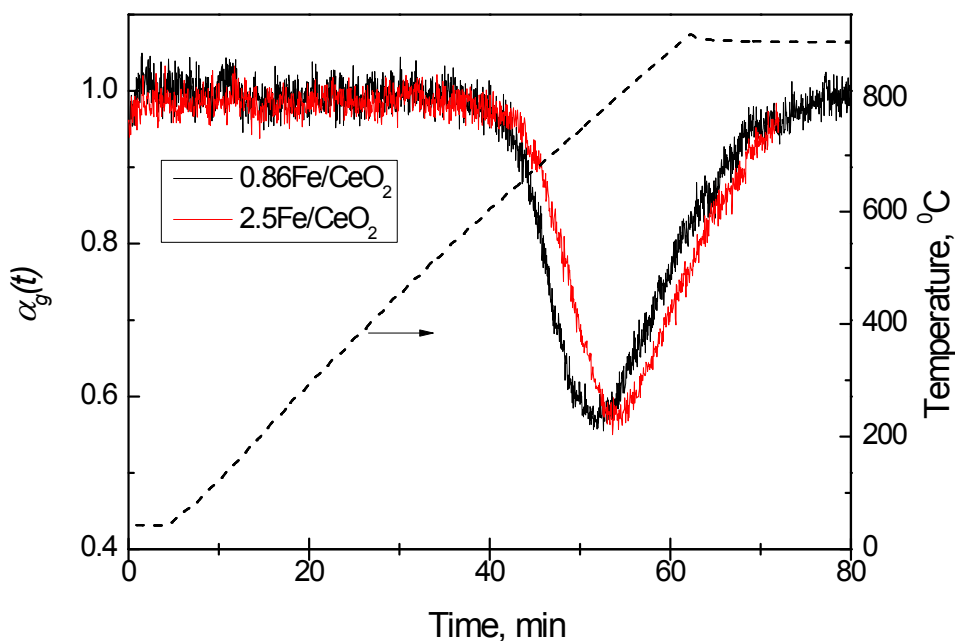

Fig.S4.  $\alpha_g(t)$  variation with time for 0.86Fe/CeO<sub>2</sub> and 2.5Fe/CeO<sub>2</sub> samples during TPIE.

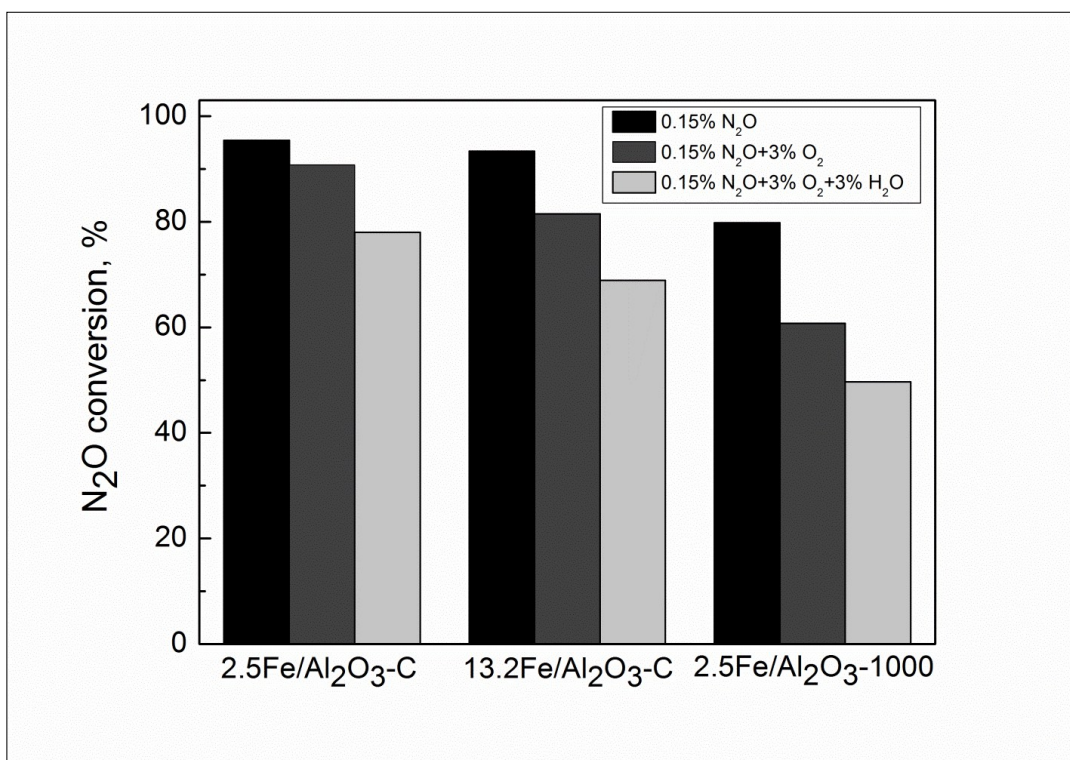

Fig. S5. Effect of O<sub>2</sub> (3 vol.%) and H<sub>2</sub>O (3 vol.%) addition to 0.15%N<sub>2</sub>O in He mixture on N<sub>2</sub>O conversion at 900 °C.

### O<sub>2</sub> TPD.

TPD O<sub>2</sub> experiments were carried out for the powder with 250 – 500 μm size fraction in a plug-flow quartz reactor coupled to QMS-200 mass-spectrometer. Before each experiment, the samples were heated in the flow containing 20%O<sub>2</sub> in He up to 900 °C, then conditioned for 30 min and cooled down to room temperature in the same flow. Finally, heating from room temperature to 900 °C at a rate 10 °C/min was performed in He flow. Flow rate was the same in all stages of TPD experiment and amounted to 18 cm<sup>3</sup>/min. A quantity of 200 mg was used for each test.

We didn't observe any O<sub>2</sub> desorption from CeO<sub>2</sub>, NiO, Fe<sub>2</sub>O<sub>3</sub> and supported 0.86Ni(Fe)/CeO<sub>2</sub> and 2.5Me/Al<sub>2</sub>O<sub>3</sub> samples during temperature programmed desorption up to 900°C. In the samples 0.86%Co/CeO<sub>2</sub> and bulk Co<sub>3</sub>O<sub>4</sub> obtained by calcination of Co(NO<sub>3</sub>)<sub>2</sub> at 900°C evolution of O<sub>2</sub> into gas phase started at 750°C (Fig. S6). However, TPD peaks were characterized by different T<sub>max</sub> values (820°C for supported and ≥903°C - for massive oxide). Desorption of about 1.3·10<sup>19</sup> O<sub>2</sub> mol/g from 0.86%Co/CeO<sub>2</sub> containing 8.7·10<sup>19</sup> Co at/g can correspond to reduction of Co<sub>3</sub>O<sub>4</sub> to

CoO that is already reported both for bulk CoO and for Co-CeO<sub>2</sub> solid solutions [10, 11] without participation of oxygen from CeO<sub>2</sub> lattice. In this case lower value of T<sub>max</sub> for 0.86%Co/CeO<sub>2</sub> can be explained by stronger diffusion limitation in bulk oxide characterized by S<sub>BET</sub> value at 0.2 m<sup>2</sup>/g.

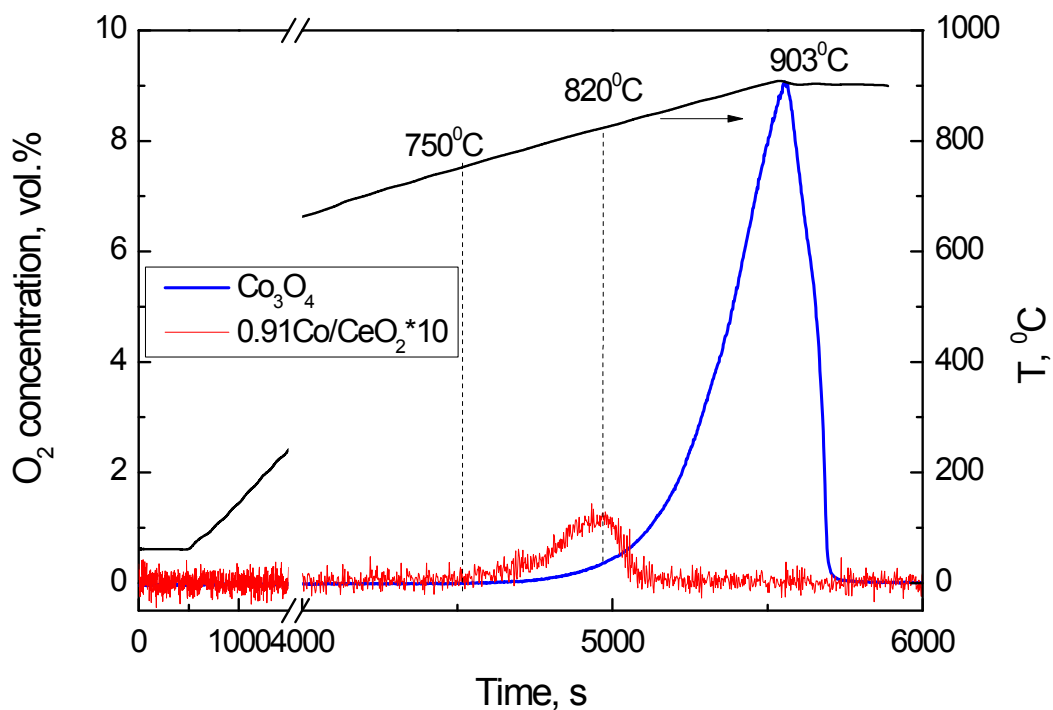

Fig. S6. O<sub>2</sub> desorption during TPD in He from bulk Co<sub>3</sub>O<sub>4</sub> and 0.91Co/CeO<sub>2</sub> samples.

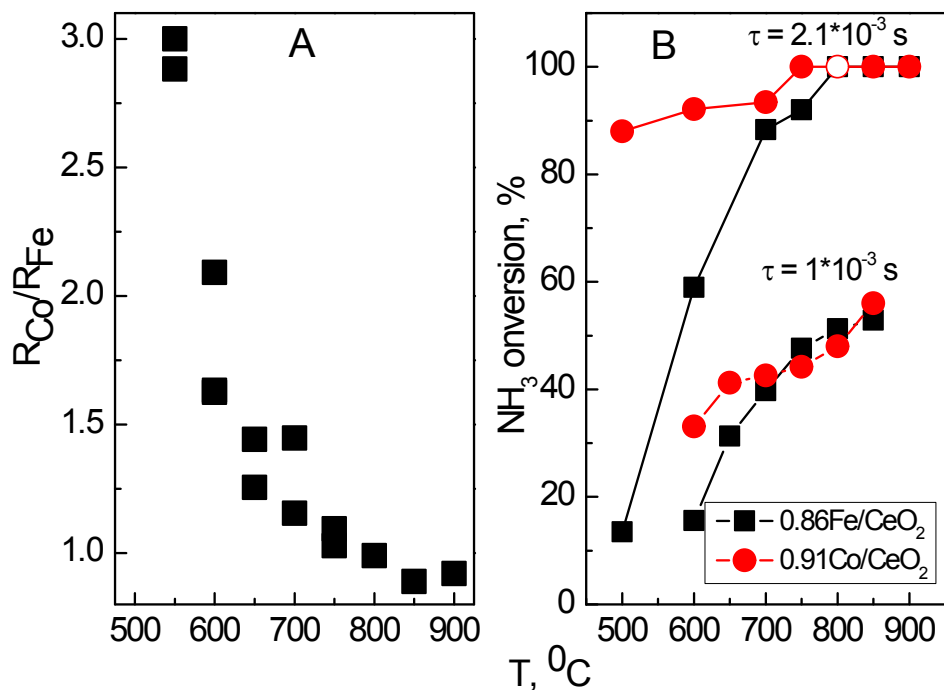

Fig.S7. Temperature dependency of: A – ratio of the rates of  $N_2O$  decomposition on  $0.91Co/CeO_2$  ( $R_{Co}$ ) and  $0.86Fe/CeO_2$  ( $R_{Fe}$ ) samples, B –  $NH_3$  conversion at different contact times ( $\tau$ ).

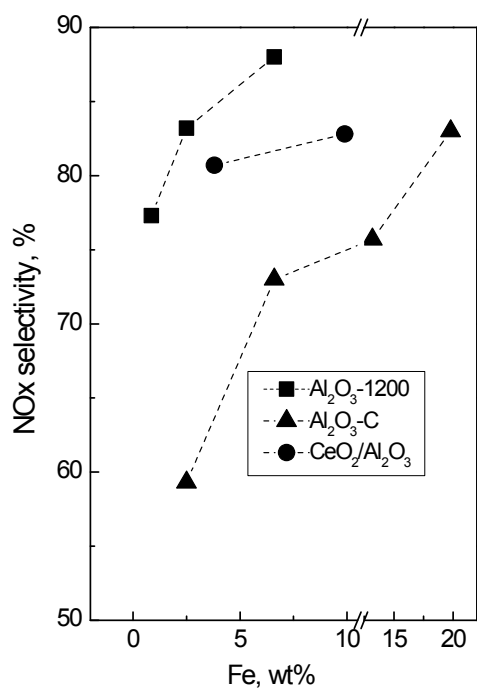

Fig. S8.  $NO_x$  selectivity depending on Fe content in  $Al_2O_3-1200$ ,  $Al_2O_3-C$ , and  $Ce/Al_2O_3$  based samples at  $800^{\circ}C$ . Catalyst charge 0.015 g, gas flow rate 25 l/h.
